# Supplementary material
Source: HighWire-hosted journal article supplement (https://cmajopen.ca/highwire/filestream/89691/field_highwire_adjunct_files/3/open-2022-0095-gripp2-checklist.pdf)
Supplement: open-2022-0095-gripp2-checklist.pdf [file open-2022-0095-gripp2-checklist.pdf]

**GRIPP2 Short Form for “Walk-in Clinic Patient Characteristics and Utilization Patterns in Ontario, Canada: A Cross-Sectional Study”**

| <b>Section and Topic</b>            | <b>Item</b>                                                                                                                                                                                                                                                                                                                                                                      | <b>Location (page #)</b> |
|-------------------------------------|----------------------------------------------------------------------------------------------------------------------------------------------------------------------------------------------------------------------------------------------------------------------------------------------------------------------------------------------------------------------------------|--------------------------|
| 1: Aim                              | To have PPI to review analysis and interpretation of the use of walk-in clinics in Ontario.                                                                                                                                                                                                                                                                                      | p. 6                     |
| 2: Methods                          | Four patient partners were recruited to the research team at the data collection stage of the study. They were involved in meetings in which the study team presented the analysis plan and findings. Patient partners helped interpret results and participated in discussions of the benefits and drawbacks of walk-in clinics.                                                | p. 6                     |
| 3: Study Results                    | PPI contributed to the study by: <ul style="list-style-type: none"> <li>• Reviewing and affirming the analyses presented</li> <li>• Providing a better understanding of why patients may choose and prefer walk-in clinics to their own family physician.</li> <li>• Editing and providing comments on the manuscript to increase readability for a general audience.</li> </ul> | p. 14                    |
| 4: Discussion and Conclusions       | The inclusion of patient partners in this research was helpful to provide insights on why patients may prefer walk-in clinics.                                                                                                                                                                                                                                                   | p. 16                    |
| 5: Reflections/Critical Perspective | The inclusion of patient partners in this research was helpful to provide insights on why patients may prefer walk-in clinics.                                                                                                                                                                                                                                                   | p. 16                    |

PPI=patient and public involvement.

Staniszewska S, Brett J, Simera I, et al. GRIPP2 reporting checklists: tools to improve reporting of patient and public involvement in research. *BMJ*. 2017;358:j3453. doi:10.1136/bmj.j3453
